# Supplementary material for: Exendin-4-enriched exosomes from hUCMSCs alleviate diabetic nephropathy via gut microbiota and immune modulation
Source: Front Microbiol. 2024 Aug 30;15:1399632. doi: 10.3389/fmicb.2024.1399632 (PMC11392743; doi:10.3389/fmicb.2024.1399632)
Supplement: Supplementary file 4 [file Table_3.XLSX]

## Sheet: Sheet1
Supplementary Table 3 T1D-related gut microbiotas from HMDAD database
Disease name	Microbe name	Evidence	PMID
Type 1 diabetes	Acetonema	Decrease	22043294
Type 1 diabetes	Actinobacillus	Increase	22043294
Type 1 diabetes	Actinobacteria	Increase	22043294
Type 1 diabetes	Aggregatibacter	Increase	22043294
Type 1 diabetes	Akkermansia	Decrease	22043294
Type 1 diabetes	Alistipes	Increase	22043294
Type 1 diabetes	Anaerofilum	Decrease	22043294
Type 1 diabetes	Anaerostipes	Decrease	22043294
Type 1 diabetes	Anaerotruncus	Decrease	22043294
Type 1 diabetes	Bacillus	Decrease	22043294
Type 1 diabetes	Bacterium 08.96.4	Decrease	22043294
Type 1 diabetes	Bacterium ASF500	Decrease	22043294
Type 1 diabetes	Bacterium B4C2-5	Decrease	22043294
Type 1 diabetes	Bacterium Ba2	Increase	22043294
Type 1 diabetes	Bacterium C15	Increase	22043294
Type 1 diabetes	Bacterium G100VIII	Increase	22043294
Type 1 diabetes	Bacterium ic1214	Increase	22043294
Type 1 diabetes	Bacterium ic1258	Increase	22043294
Type 1 diabetes	Bacterium ic1292	Increase	22043294
Type 1 diabetes	Bacterium ic1296	Decrease	22043294
Type 1 diabetes	Bacterium ic1311	Increase	22043294
Type 1 diabetes	Bacterium ic1379	Decrease	22043294
Type 1 diabetes	Bacterium ic1391	Increase	22043294
Type 1 diabetes	Bacterium MB7-1	Increase	22043294
Type 1 diabetes	Bacterium mpn-isolate group 19	Increase	22043294
Type 1 diabetes	Bacterium mpn-isolate group 22	Decrease	22043294
Type 1 diabetes	Bacterium mpn-isolate group 24	Decrease	22043294
Type 1 diabetes	Bacterium mpn-isolate group 27	Increase	22043294
Type 1 diabetes	Bacterium mpn-isolate group 5	Increase	22043294
Type 1 diabetes	Bacterium 'New Zealand B'	Increase	22043294
Type 1 diabetes	Bacterium str. 31285	Decrease	22043294
Type 1 diabetes	Bacterium YE62	Decrease	22043294
Type 1 diabetes	Bacterium YE64	Increase	22043294
Type 1 diabetes	Bacteroidaceae	Increase	20613793
Type 1 diabetes	Bacteroidaceae bacterium Smarlab 3301643	Increase	22043294
Type 1 diabetes	Bacteroides	Increase	20613793
Type 1 diabetes	Bacteroides	Increase	22043294
Type 1 diabetes	Bacteroides fragilis	Decrease	20613793
Type 1 diabetes	Bacteroides ovatus	Increase	20613793
Type 1 diabetes	Bacteroides sp. CJ78	Increase	20613793
Type 1 diabetes	Bacteroides thetaiotaomicron	Increase	20613793
Type 1 diabetes	Bacteroides uniformis	Increase	20613793
Type 1 diabetes	Bacteroides vulgatus	Decrease	20613793
Type 1 diabetes	Bacteroidetes	Increase	20613793
Type 1 diabetes	Bacteroidetes	Increase	22043294
Type 1 diabetes	Bifidobacterium	Increase	22043294
Type 1 diabetes	Bovine rumen bacterium JPR13	Increase	22043294
Type 1 diabetes	Brenneria	Increase	22043294
Type 1 diabetes	Burkholderiales bacterium Smarlab 3302047	Decrease	22043294
Type 1 diabetes	Butyrate-producing bacterium ART55/1	Decrease	22043294
Type 1 diabetes	Butyrate-producing bacterium L1-810	Decrease	22043294
Type 1 diabetes	Butyrate-producing bacterium L1-952	Decrease	22043294
Type 1 diabetes	Butyrate-producing bacterium L2-50	Decrease	22043294
Type 1 diabetes	Butyrate-producing bacterium M104/1	Decrease	22043294
Type 1 diabetes	Butyrate-producing bacterium M21/2	Decrease	22043294
Type 1 diabetes	Butyrate-producing bacterium M50/1	Decrease	22043294
Type 1 diabetes	Butyrate-producing bacterium P607	Decrease	22043294
Type 1 diabetes	Butyrate-producing bacterium PH05YB02	Decrease	22043294
Type 1 diabetes	Butyrate-producing bacterium Ph07AY02	Decrease	22043294
Type 1 diabetes	Butyrate-producing bacterium PH07AY3	Decrease	22043294
Type 1 diabetes	Butyrate-producing bacterium PH07AY5	Decrease	22043294
Type 1 diabetes	Butyrate-producing bacterium PH07BY04	Decrease	22043294
Type 1 diabetes	Butyrate-producing bacterium SL6/1/1	Increase	22043294
Type 1 diabetes	Butyrate-producing bacterium SM4/1	Decrease	22043294
Type 1 diabetes	Butyrate-producing bacterium SR1/1	Increase	22043294
Type 1 diabetes	Butyrate-producing bacterium SR1/5	Decrease	22043294
Type 1 diabetes	Butyrate-producing bacterium SS2/1	Decrease	22043294
Type 1 diabetes	Butyrate-producing bacterium SSC/2	Increase	22043294
Type 1 diabetes	Butyrate-producing bacterium T2-132	Increase	22043294
Type 1 diabetes	Citrobacter	Increase	22043294
Type 1 diabetes	Clostridia	Decrease	20613793
Type 1 diabetes	Clostridia bacterium TSW07CA7	Decrease	22043294
Type 1 diabetes	Clostridiaceae bacterium bSSV31	Increase	22043294
Type 1 diabetes	Clostridiaceae bacterium LEMV63	Increase	22043294
Type 1 diabetes	Clostridiaceae bacterium SH032	Decrease	22043294
Type 1 diabetes	Clostridiaceae bacterium SK061	Decrease	22043294
Type 1 diabetes	Clostridiales bacterium 80/3	Decrease	22043294
Type 1 diabetes	Clostridiales bacterium A2-162	Decrease	22043294
Type 1 diabetes	Clostridiales bacterium AHT16	Increase	22043294
Type 1 diabetes	Clostridiales bacterium L2-14	Increase	22043294
Type 1 diabetes	Clostridium innocuum	Increase	22043294
Type 1 diabetes	Clostridium ramosum	Increase	22043294
Type 1 diabetes	Clostridium spiroforme	Increase	22043294
Type 1 diabetes	Collinsella	Increase	22043294
Type 1 diabetes	Coprobacillus	Increase	22043294
Type 1 diabetes	Cronobacter	Increase	22043294
Type 1 diabetes	Dehalobacterium	Increase	22043294
Type 1 diabetes	Desulfotomaculum	Increase	22043294
Type 1 diabetes	Dialister	Decrease	22043294
Type 1 diabetes	Dysgonomonas	Decrease	22043294
Type 1 diabetes	Edwardsiella	Increase	22043294
Type 1 diabetes	Enterobacter	Increase	22043294
Type 1 diabetes	Erwinia	Increase	22043294
Type 1 diabetes	Erysipelothrix	Decrease	22043294
Type 1 diabetes	Escherichia	Increase	22043294
Type 1 diabetes	Eubacteriaceae	Decrease	20613793
Type 1 diabetes	Eubacterium	Increase	22043294
Type 1 diabetes	Eubacterium eligens	Decrease	20613793
Type 1 diabetes	Eubacterium rectale	Decrease	20613793
Type 1 diabetes	Eubacterium tortuosum	Increase	22043294
Type 1 diabetes	Faecalibacterium	Decrease	20613793
Type 1 diabetes	Faecalibacterium	Decrease	22043294
Type 1 diabetes	Firmicutes	Decrease	20613793
Type 1 diabetes	Firmicutes	Decrease	22043294
Type 1 diabetes	Firmicutes bacterium EG14	Increase	22043294
Type 1 diabetes	Firmicutes str. C29	Decrease	22043294
Type 1 diabetes	Fusobacteria	Decrease	22043294
Type 1 diabetes	Fusobacterium	Decrease	22043294
Type 1 diabetes	Gram-negative bacterium cL10-2b-4	Decrease	22043294
Type 1 diabetes	Haemophilus	Increase	22043294
Type 1 diabetes	Hafnia	Increase	22043294
Type 1 diabetes	Human intestinal firmicute CB47	Decrease	20613793
Type 1 diabetes	Human intestinal firmicute CB47	Decrease	22043294
Type 1 diabetes	Human intestinal firmicute CO13	Decrease	22043294
Type 1 diabetes	Human intestinal firmicute CO19	Decrease	20613793
Type 1 diabetes	Human intestinal firmicute CO19	Decrease	22043294
Type 1 diabetes	Human intestinal firmicute CO2	Decrease	22043294
Type 1 diabetes	Human intestinal firmicute CO35	Increase	22043294
Type 1 diabetes	Human intestinal firmicute CO4	Decrease	22043294
Type 1 diabetes	Human intestinal firmicute CS26	Decrease	22043294
Type 1 diabetes	Klebsiella	Increase	22043294
Type 1 diabetes	Lachnobacterium	Decrease	22043294
Type 1 diabetes	Lachnospiraceae	Decrease	20613793
Type 1 diabetes	Lachnospiraceae bacterium A2	Increase	22043294
Type 1 diabetes	Lactobacillus	Decrease	22043294
Type 1 diabetes	Lactococcus	Decrease	22043294
Type 1 diabetes	Mannheimia	Increase	22043294
Type 1 diabetes	Mastodon intestinal bacterium AN-22-6	Increase	22043294
Type 1 diabetes	Mogibacterium	Decrease	22043294
Type 1 diabetes	Odoribacter	Decrease	22043294
Type 1 diabetes	Oligella	Increase	22043294
Type 1 diabetes	Oscillibacter	Decrease	22043294
Type 1 diabetes	Oscillospira	Decrease	22043294
Type 1 diabetes	Oscillospiraceae bacterium NML 061048	Decrease	22043294
Type 1 diabetes	Pantoea	Increase	22043294
Type 1 diabetes	Parabacteroides	Decrease	22043294
Type 1 diabetes	Pasteurella	Increase	22043294
Type 1 diabetes	Pectobacterium	Increase	22043294
Type 1 diabetes	Peptostreptococcus	Increase	22043294
Type 1 diabetes	Phascolarctobacterium	Decrease	22043294
Type 1 diabetes	Porphyromonadaceae	Decrease	20613793
Type 1 diabetes	Porphyromonas	Decrease	22043294
Type 1 diabetes	Prevotella	Decrease	22043294
Type 1 diabetes	Proteobacteria	Increase	22043294
Type 1 diabetes	Pusillimonas	Increase	22043294
Type 1 diabetes	Rikenellaceae	Increase	20613793
Type 1 diabetes	Roseburia	Decrease	22043294
Type 1 diabetes	Rumen bacterium 8/94-32	Decrease	22043294
Type 1 diabetes	Rumen bacterium R-7	Increase	22043294
Type 1 diabetes	Rumen bacterium R-9	Decrease	22043294
Type 1 diabetes	Ruminococcaceae	Decrease	20613793
Type 1 diabetes	Salmonella	Increase	22043294
Type 1 diabetes	Segmented filamentous bacterium	Increase	22043294
Type 1 diabetes	Serratia	Increase	22043294
Type 1 diabetes	Shigella	Increase	22043294
Type 1 diabetes	Shuttleworthia	Decrease	22043294
Type 1 diabetes	Solobacterium	Increase	22043294
Type 1 diabetes	Streptococcus	Increase	22043294
Type 1 diabetes	Subdoligranulum	Decrease	22043294
Type 1 diabetes	Sutterella	Decrease	22043294
Type 1 diabetes	Swine fecal bacterium FPC67	Decrease	22043294
Type 1 diabetes	Swine fecal bacterium FPC70	Increase	22043294
Type 1 diabetes	Swine fecal bacterium RF3E-Xyl1	Decrease	22043294
Type 1 diabetes	Swine fecal bacterium SD-Pec1	Decrease	22043294
Type 1 diabetes	Swine manure pit bacterium PPC108	Increase	22043294
Type 1 diabetes	Tenericutes	Decrease	22043294
Type 1 diabetes	Terrahaemophilus	Increase	22043294
Type 1 diabetes	Unidentified bacterium ZF3	Decrease	22043294
Type 1 diabetes	Veillonella	Increase	22043294
Type 1 diabetes	Verrucomicrobia	Decrease	22043294
Type 1 diabetes	Verrucomicrobia bacterium MS-F-88	Decrease	22043294
Type 1 diabetes	Vibrio	Increase	22043294
Type 1 diabetes	Yersinia	Increase	22043294
